# Supplementary material for: The Integration of Metabolomics and Transcriptomics Provides New Insights for the Identification of Genes Key to Auxin Synthesis at Different Growth Stages of Maize
Source: Int J Mol Sci. 2022 Oct 30;23(21):13195. doi: 10.3390/ijms232113195 (PMC9659120; doi:10.3390/ijms232113195)
Supplement: Supplementary file 1 [file ijms-23-13195-s001.zip › Table S1.pdf]

**Table S1 Genes IDs and primers used in the quantitative real-time PCR (qRT-PCR) experiments.**

| Primer_ID      | Forward PCR Primer (5'-3') | Reverse PCR Primer (5'-3') |
|----------------|----------------------------|----------------------------|
| <i>Actin</i>   | TCCCAAGGCAAACAGAGAAA       | GGCCACTAGCATATAGGGAAAG     |
| Zm00001d039691 | CACGGAGATGGGCCTAGTTG       | TGCCCTACTCATGCATGCTC       |
| Zm00001d018098 | ATCTGGAACCTGGGCCGTTTT      | TGCTTCAGACATGTCACCCG       |
| Zm00001d037674 | GGTACGTGCGTAACAACAGC       | TCTGCGACTCCTTGCATACG       |
| Zm00001d025005 | GTGGCTCGAGGTAAATCCGT       | GCCGTCTTGGGGTATCCTTC       |
| Zm00001d004467 | AGTCAAGAGCATTCCCTTCGT      | GGGTACCCGTCCTTGTTGAA       |
| Zm00001d019527 | TCAAGAGGTTCTTCCGTGGC       | CCACGCACTATGGGATGTGA       |
| Zm00001d008255 | GCATCATCTTCACGCGATGG       | AAGTCTGACGCATCACCAGG       |
| Zm00001d005439 | CGTGGAATGGGAGAAGCAGA       | CGTGGAGTTACCAGGTCGTC       |
| Zm00001d006283 | GAGCCACACATCAGATCGCT       | AGTTGCAGCCTTGCAGGATT       |
| Zm00001d051754 | CGCTCGGGAGGAGATATTCG       | TTATTGCCCTGCGTGACTGT       |
| Zm00001d008700 | TGAACGTCCACGTACGCAT        | GATGTCGTAGGCATCGTCCC       |
| Zm00001d044339 | TGCCTTCCCTCAAGCAACAT       | CGGGTGTTGTTTCGCTTTCTG      |
